# Supplementary material for: Detection of SARS‐CoV‐2 in respiratory samples from cats in the UK associated with human‐to‐cat transmission
Source: PubMed Central journal article supplement (PMC8251078; doi:10.1002/vetr.247), 2021-04-22
Supplement: VETR-188-no-s001.pdf [file VETR-188-no-s001.pdf]

We gratefully acknowledge the following Authors from the Originating laboratories responsible for obtaining the specimens, as well as the Submitting laboratories where the genome data were generated and shared via GISAID, on which this research is based.

Submitting laboratories where the genome data were generated and shared via GISAID, on which this research is based.

All Submitters of data may be contacted directly via [www.gisaid.org](http://www.gisaid.org)

| Accession ID                               | Originating Laboratory                                                                                         | Submitting Laboratory                                                                                              |
|--------------------------------------------|----------------------------------------------------------------------------------------------------------------|--------------------------------------------------------------------------------------------------------------------|
| EPI_ISL_420293                             | Wildlife Conservation Society, Bronx Zoo                                                                       | Diagnostic Virology Laboratory, United States Department of Agriculture, National Veterinary Services Laboratories |
| EPI_ISL_421531                             | State Key Laboratory of Agricultural Microbiology                                                              | State Key Laboratory of Agricultural Microbiology                                                                  |
| EPI_ISL_437349                             | Ecole nationale vétérinaire d'Alfort-laboratoire de santé animale Anses UMR 1161 de virologie ENVA-Anses-INRAE | Institut Pasteur CIBU-ERI                                                                                          |
| EPI_ISL_450406                             | Molecular Diagnostics, Antech Diagnostics                                                                      | Molecular Diagnostics, Antech Diagnostics                                                                          |
| EPI_ISL_450407                             | Molecular Diagnostics, Antech Diagnostics                                                                      | Molecular Diagnostics, Antech Diagnostics                                                                          |
| EPI_ISL_482820                             | Centre de Recerca en Sanitat Animal (IRTA-CReSA)                                                               | IrsCaixa AIDS Research Lab                                                                                         |
| EPI_ISL_483063, EPI_ISL_483064             | unknown                                                                                                        | Virology, Ecole Nationale Vétérinaire de Toulouse                                                                  |
| EPI_ISL_487275                             | unknown                                                                                                        | Department of Veterinary Pathology, University of Liege - FARAH                                                    |
| EPI_ISL_431778                             | Virology, Wageningen Bioveterinary Research                                                                    | Virology, Wageningen Bioveterinary Research                                                                        |
| EPI_ISL_447623, EPI_ISL_447624, Et unknown | unknown                                                                                                        | Virology                                                                                                           |
| EPI_ISL_447631                             | unknown                                                                                                        | Virology                                                                                                           |
| EPI_ISL_447632, EPI_ISL_447633, Et unknown | unknown                                                                                                        | Virology                                                                                                           |
